# Supplementary material for: Novel genetic variants of KHDC3L and other members of the subcortical maternal complex associated with Beckwith–Wiedemann syndrome or Pseudohypoparathyroidism 1B and multi-locus imprinting disturbances
Source: PubMed Central journal article supplement (PMC9148495; doi:10.1186/s13148-022-01292-w), 2022-05-28
Supplement: 13148_2022_1292_MOESM4_ESM.pdf [file 13148_2022_1292_MOESM4_ESM.pdf]

**Table S2.** List of the SCMC missense variants and prediction of their effect on the protein structure and function

| Gene          | Position (hg19) | Alleles | Variant ID (dbSNP) | <sup>a</sup> Allele frequency (ALL) | <sup>b</sup> Allele frequency (NFE) | <sup>c</sup> Genotype frequency (NFE) | Conservation in orthologous proteins | AA     | <sup>d</sup> ACMG classification | Prediction                |                    |                       |
|---------------|-----------------|---------|--------------------|-------------------------------------|-------------------------------------|---------------------------------------|--------------------------------------|--------|----------------------------------|---------------------------|--------------------|-----------------------|
|               |                 |         |                    |                                     |                                     |                                       |                                      |        |                                  | PolyPhen-2                | SIFT               | SDM (DDG kcal/mol)    |
| <i>KHDC3L</i> | Chr 6:74072944  | C>G     | novel              | -                                   | -                                   | -                                     | No                                   | T99R   | Uncertain significance           | Possibly damaging (0.908) | Deleterious (0)    | Destabilizing (-0.51) |
| <i>PADI6</i>  | Chr 1:17701983  | T>C     | novel              | -                                   | -                                   | -                                     | Yes                                  | L119P  | Uncertain significance           | Probably damaging (1)     | Deleterious (0)    | Destabilizing (-4.01) |
| <i>PADI6</i>  | Chr 1:17714971  | G>A     | rs74834315         | 0.0203126                           | 0.0014096                           | 0                                     | Yes                                  | V259I  | Uncertain significance           | Benign (0.003)            | Deleterious (0.05) | Destabilizing (-0.88) |
| <i>NLRP5</i>  | Chr 19:56539284 | G>A     | rs34175666         | 0.00494142                          | 0.00742482                          | 0                                     | No                                   | R562H  | Uncertain significance           | Possibly damaging (0.54)  | Deleterious (0.02) | Destabilizing (-0.13) |
| <i>NLRP5</i>  | Chr 19:56545075 | G>A     | rs768443657        | 4.06E-06                            | 8.95E-06                            | 0                                     | Yes                                  | R872K  | Uncertain significance           | Possibly damaging (0.761) | Deleterious (0.05) | Destabilizing (-0.89) |
| <i>NLRP5</i>  | Chr 19:56569629 | C>G     | rs12462795         | 0.16983                             | 0.145242                            | 0.02203                               | Yes                                  | S1108C | Benign                           | Probably damaging (0.976) | Deleterious (0)    | Stabilizing (0.65)    |
| <i>NLRP5</i>  | Chr 19:56572875 | G>A     | rs36118060         | 0.169579                            | 0.144598                            | 0.02177                               | Yes                                  | R1195Q | Benign                           | Benign (0.293)            | Tolerated (0.11)   | Destabilizing (-1.02) |
| <i>NLRP4</i>  | Chr 19:56370038 | G>A     | rs111284755        | 0.00375796                          | 0.00581119                          | 2.00E-05                              | Yes                                  | A427T  | Uncertain significance           | Benign (0.044)            | Tolerated (0.22)   | Destabilizing (-0.11) |
| <i>NLRP2</i>  | Chr 19:55493728 | C>T     | rs17699678         | 0.0884999                           | 0.110534                            | 0.0121                                | Yes                                  | T221M  | Benign                           | Possibly damaging (0.672) | Deleterious (0.04) | Stabilizing (0.21)    |
| <i>NLRP2</i>  | Chr 19:55494121 | T>G     | rs147585490        | 0.00123848                          | 0.00186774                          | 0                                     | Yes                                  | I352S  | Uncertain significance           | Possibly damaging (0.707) | Deleterious (0)    | Destabilizing (-1.52) |
| <i>NLRP2</i>  | Chr 19:55494126 | A>G     | rs61735077         | 0.00506446                          | 0.00789988                          | 5.00E-05                              | Yes                                  | I354V  | Uncertain significance           | Benign (0.02)             | Tolerated (0.41)   | Destabilizing (-1.93) |
| <i>NLRP2</i>  | Chr 19:55494157 | G>A     | rs4306647          | 0.101262                            | 0.0407483                           | 0.00153                               | Yes                                  | R364K  | Uncertain significance           | Possibly damaging (0.487) | Tolerated (0.22)   | Destabilizing (-0.65) |

|                 |                 |     |             |            |            |         |     |       |                        |                   |                     |                          |
|-----------------|-----------------|-----|-------------|------------|------------|---------|-----|-------|------------------------|-------------------|---------------------|--------------------------|
| <i>NLRP2</i>    | Chr 19:55494747 | G>A | rs61735086  | 0.00185715 | 9.67E-05   | 0       | Yes | A561T | Uncertain significance | Benign<br>(0.055) | Tolerated<br>(0.32) | Destabilizing<br>(-1.02) |
| * <i>NLRP2</i>  | Chr 19:55493651 | C>T | rs10403648  | 0.102921   | 0.0419425  | 0.00181 | Yes | F195F | Uncertain significance | -                 | -                   | -                        |
| * <i>NLRP2</i>  | Chr 19:55494233 | G>A | rs759650015 | 7.58E-05   | 6.18E-05   | 0       | Yes | A389A | Uncertain significance | -                 | -                   | -                        |
| ** <i>NLRP2</i> | Chr 19:55481394 | C>T | rs142463014 | 0.00906567 | 0.00939562 | 0.00014 | Yes | S4L   | Uncertain significance | Benign<br>(0.129) | Tolerated<br>(0.09) | Stabilizing<br>(0.62)    |
| ** <i>NLRP7</i> | Chr 19:55439115 | A>G | rs141473720 | 1.99E-05   | 1.76E-05   | 0       | -   | Y947H | Uncertain significance | Benign<br>(0.009) | Tolerated<br>(0.25) | -                        |

Allelic and homozygous genotype frequencies were obtained querying the gnomAD- Genome database v2.1.1 with the tabix command-line utility. <sup>a</sup> Variant frequencies in all populations, <sup>b</sup> variant frequencies in non-Finnish European population, <sup>c</sup> frequencies of the variant homozygous genotype in non-Finnish European (NFE) population. <sup>d</sup> The ACMG criteria for classifying pathogenicity of the variants are reported by Richards et al., 2015. \*Two synonymous variants identified in heterozygosity in proband's mother of family 10. \*\* Rare predicted not damaging variant identified in heterozygosity in mothers of family 8 (*NLRP2* - rs142463014) and family 6 (*NLRP7* - rs141473720).
